# Supplementary material for: Virulence-Associated Genes and Genetic Diversity of Avian Pathogenic (APEC) and Fecal (AFEC) E. Coli Isolates From Chickens
Source: Research Square preprint supplement (doi:10.21203/rs.3.rs-644399/v2), 2021-08-04
Supplement: Supplementary file 1 [file 0c1c3f727c9d47bb0ae1aa98.docx]

Table S4 Primer sets for genotyping.

| Gene | Primer sequence (5´-3´) | Amplicon size (bp) | Reference |
| --- | --- | --- | --- |
| *ChuA* | F: GACGAACCAACGGTCAGGAT | 279 | Clermont et al., 2000 |
| R: TGCCGCCAGTACCAAAGACA |
| *YjaA* | F: TGAAGTGTCAGGAGACGCTG | 211 | Clermont et al., 2000 |
| R: ATGGAGAATGCGTTCCTCAAC |
| *TspE4C2.2* | F: GAGTAATGTCGGGGCATTCA | 152 | Clermont et al., 2000 |
| R: CGCGCCAACAAAGTATTACG |
