# Supplementary material for: Virulence-Associated Genes and Genetic Diversity of Avian Pathogenic (APEC) and Fecal (AFEC) E. Coli Isolates From Chickens
Source: Research Square preprint supplement (doi:10.21203/rs.3.rs-644399/v2), 2021-08-04
Supplement: Supplementary file 2 [file 1a1c5b66c59fc2f6605cd502.docx]

Table S3 Primers used for the amplification of virulence-associated genes.

| Gene | Primer sequence (5’ – 3’) | Amplicon size (bp) | Reference |
| --- | --- | --- | --- |
| adhesins | | | |
| *fimC* | F: GGAAATAACATTCTGCTTGC | 288 | Jeong et al., 2012 |
| R: TTTGTTGCATCAAGAATACG |
| *papC* | F: TGATATCACGCAGTCAGTAGC | 501 | Ewers et al., 2005 |
| R: CCGGCCATATTCACATAA |
| *tsh* | F: ACTATTCTCTGCAGGAAGTC | 824 | Ewers et al., 2005 |
| R: CTTCCGATGTTCTGAACGT |
| *mat* | F: TATACGCTGGACTGAGTCGTG | 899 | Ewers et al., 2007 |
| R: CAGGTAGCGTCGAACTGTA |
| invasins | | | |
| *ibeA* | F: TGGAACCCGCTCGTAATATAC | 342 | Ewers et al., 2007 |
| R: CTGCCTGTTCAAGCATTGCA |
| toxins | | | |
| *astA* | F: TGCCATCAACACAGTATATCC | 116 | Ewers et al., 2005 |
| R: TCAGGTCGCGAGTGACGGC |
| *vat* | F: TCCTGGGACATAATGGTCAG | 981 | Ewers et al., 2005 |
| R: GTGTCAGAACGGAATTGT |
| *hlyF* | F: GGCGATTTAGGCATTCCGATACTC | 599 | Johnson et al., 2006 |
| R: ACGGGGTCGCTAGTTAAGGAG |
| iron acquisition systems | | | |
| *iroN* | F: AAGTCAAAGCAGGGGTTGCCCG | 667 | Johnson et al., 2006 |
| R: GACGCCGACATTAAGACGCAG |
| *fyuA* | F: CAACATCGTCACCCAGCAG | 949 | Jeong et al., 2012 |
| R: CGCAGTAGGCACGATGTTGTA |
| *iucD* | F: ACAAAAAGTTCTATCGCTTCC | 714 | Ewers et al., 2005 |
| R: CCTGATCCAGCTGATGCTC |
| *irp2* | F: AAGGATTCGCTGTTACCGGAC | 413 | Ewers et al., 2005 |
| R: AACTCCTGATACAGGTGGC |
| protectins/Serum resistance | | | |
| *iss* | F: AGCAACCCGAACCACTTGATG | 329 | Jeong et al., 2012 |
| R: TAATAAGCATTGCCAGAGCGG |
| *neuC* | F: GGTGGTACATTCCGGGATGTC | 676 | Maciel et al., 2017 |
| R: AGGTGAAAAGCCTGGTAGTGTG |
| *ompT* | F: ATCTAGCCGAAGAAGGAGGC | 559 | Johnson et al., 2006 |
| R: CCCGGGTCATAGTGTTCATC |
| *cva/cvi* | F: TGGTAGAATGTGCCAGAGCAAG | 1181 | Subedi et al., 2018 |
| R: GAGCTGTTTGTAGCGAAGCC |
