# Supplementary material for: Virulence-Associated Genes and Genetic Diversity of Avian Pathogenic (APEC) and Fecal (AFEC) E. Coli Isolates From Chickens
Source: Research Square preprint supplement (doi:10.21203/rs.3.rs-644399/v2), 2021-08-04
Supplement: Supplementary file 3 [file 72180fcf9a604b8a71d0141b.docx]

Table S2 The prevalence of STs between the APEC and AFEC strains.

| ST | Allele profiles | | | | | | | APEC (n=392) | | AFEC (n=536) | | Total (n=928) | |
| --- | --- | --- | --- | --- | --- | --- | --- | --- | --- | --- | --- | --- | --- |
| *aspC* | *clpX* | *fadD* | *icdA* | *lysP* | *mdh* | *uidA* | Number | Percentage | Number | Percentage | Number | Percentage |
| 88 | 32 | 12 | 61 | 12 | 1 | 12 | 12 | 43 | 10.97% | 56 | 10.45% | 99 | 10.67% |
| 243 | 5 | 5 | 13 | 2 | 1 | 13 | 23 | 39 | 9.95% | 44 | 8.21% | 83 | 8.94% |
| 461 | 5 | 5 | 2 | 30 | 1 | 8 | 1 | 45 | 11.48% | 27 | 5.04% | 72 | 7.76% |
| 142 | 7 | 5 | 2 | 2 | 1 | 13 | 5 | 0 | 0.00% | 67 | 12.50% | 67 | 7.22% |
| 855 | 4 | 58 | 77 | 38 | 1 | 13 | 84 | 21 | 5.36% | 43 | 8.02% | 64 | 6.90% |
| 254 | 7 | 5 | 77 | 4 | 1 | 5 | 95 | 26 | 6.63% | 31 | 5.78% | 57 | 6.14% |
| 749 | 5 | 6 | 176 | 25 | 1 | 8 | 1 | 8 | 2.04% | 45 | 8.40% | 53 | 5.71% |
| 131 | 4 | 6 | 2 | 39 | 1 | 5 | 41 | 25 | 6.38% | 20 | 3.73% | 45 | 4.85% |
| 721 | 5 | 6 | 167 | 25 | 1 | 8 | 1 | 8 | 2.04% | 33 | 6.16% | 41 | 4.42% |
| 85 | 3 | 3 | 2 | 4 | 6 | 2 | 36 | 18 | 4.59% | 13 | 2.43% | 31 | 3.34% |
| 29 | 21 | 24 | 10 | 8 | 17 | 11 | 25 | 11 | 2.81% | 15 | 2.80% | 26 | 2.80% |
| 144 | 5 | 5 | 5 | 2 | 1 | 5 | 1 | 9 | 2.30% | 17 | 3.17% | 26 | 2.80% |
| 1198 | 4 | 200 | 2 | 4 | 1 | 12 | 1 | 12 | 3.06% | 11 | 2.05% | 23 | 2.48% |
| 925 | 3 | 5 | 13 | 2 | 1 | 13 | 23 | 15 | 3.83% | 6 | 1.12% | 21 | 2.26% |
| 1200 | 25 | 158 | 58 | 59 | 39 | 126 | 279 | 8 | 2.04% | 11 | 2.05% | 19 | 2.05% |
| 134 | 5 | 6 | 13 | 25 | 1 | 8 | 1 | 14 | 3.57% | 3 | 0.56% | 17 | 1.83% |
| 140 | 7 | 5 | 2 | 2 | 1 | 13 | 1 | 0 | 0.00% | 17 | 3.17% | 17 | 1.83% |
| 1199 | 158 | 10 | 247 | 63 | 46 | 62 | 1 | 12 | 3.06% | 3 | 0.56% | 15 | 1.62% |
| 1201 | 37 | 39 | 39 | 46 | 136 | 43 | 45 | 5 | 1.28% | 9 | 1.68% | 14 | 1.51% |
| 160 | 32 | 35 | 13 | 38 | 1 | 13 | 1 | 13 | 3.32% | 0 | 0.00% | 13 | 1.40% |
| 116 | 4 | 4 | 2 | 2 | 1 | 3 | 3 | 7 | 1.79% | 4 | 0.75% | 11 | 1.19% |
| 117 | 4 | 4 | 2 | 2 | 1 | 2 | 2 | 6 | 1.53% | 5 | 0.93% | 11 | 1.19% |
| 127 | 4 | 6 | 2 | 4 | 1 | 6 | 6 | 5 | 1.28% | 5 | 0.93% | 10 | 1.08% |

Table S2 (Continued)

| ST | Allele profiles | | | | | | | APEC (n=392) | | AFEC (n=536) | | Total (n=928) | |
| --- | --- | --- | --- | --- | --- | --- | --- | --- | --- | --- | --- | --- | --- |
| *aspC* | *clpX* | *fadD* | *icdA* | *lysP* | *mdh* | *uidA* | Number | Percentage | Number | Percentage | Number | Percentage |
| 1203 | 4 | 58 | 13 | 2 | 1 | 13 | 84 | 6 | 1.53% | 4 | 0.75% | 10 | 1.08% |
| 165 | 4 | 12 | 13 | 15 | 1 | 1 | 1 | 5 | 1.28% | 2 | 0.37% | 7 | 0.75% |
| 171 | 3 | 3 | 1 | 1 | 1 | 1 | 1 | 7 | 1.79% | 0 | 0.00% | 7 | 0.75% |
| 388 | 5 | 6 | 2 | 4 | 1 | 8 | 1 | 5 | 1.28% | 2 | 0.37% | 7 | 0.75% |
| 742 | 4 | 6 | 13 | 25 | 1 | 8 | 1 | 7 | 1.79% | 0 | 0.00% | 7 | 0.75% |
| N1 | 7 | 5 | 13 | 4 | 1 | 5 | 95 | 0 | 0.00% | 7 | 1.31% | 7 | 0.75% |
| 1006 | 5 | 93 | 2 | 50 | 1 | 2 | 81 | 3 | 0.77% | 3 | 0.56% | 6 | 0.65% |
| 1202 | 37 | 201 | 39 | 46 | 29 | 43 | 45 | 1 | 0.26% | 5 | 0.93% | 6 | 0.65% |
| N4 | 32 | 12 | 13 | 12 | 1 | 12 | 23 | 0 | 0.00% | 6 | 1.12% | 6 | 0.65% |
| 89 | 5 | 5 | 5 | 2 | 3 | 5 | 5 | 3 | 0.77% | 1 | 0.19% | 4 | 0.43% |
| 119 | 4 | 2 | 2 | 2 | 1 | 2 | 2 | 2 | 0.51% | 2 | 0.37% | 4 | 0.43% |
| 223 | 5 | 6 | 71 | 2 | 1 | 8 | 1 | 1 | 0.26% | 2 | 0.37% | 3 | 0.32% |
| 656 | 3 | 9 | 1 | 7 | 1 | 1 | 1 | 0 | 0.00% | 3 | 0.56% | 3 | 0.32% |
| N2 | 119 | 30 | 29 | 77 | 18 | 124 | 102 | 0 | 0.00% | 3 | 0.56% | 3 | 0.32% |
| 230 | 5 | 6 | 71 | 25 | 1 | 8 | 1 | 1 | 0.26% | 1 | 0.19% | 2 | 0.22% |
| 260 | 25 | 62 | 85 | 59 | 39 | 70 | 31 | 1 | 0.26% | 1 | 0.19% | 2 | 0.22% |
| 836 | 1 | 1 | 4 | 3 | 2 | 1 | 4 | 0 | 0.00% | 2 | 0.37% | 2 | 0.22% |
| N3 | 4 | 6 | 77 | 2 | 1 | 13 | 84 | 0 | 0.00% | 2 | 0.37% | 2 | 0.22% |
| 65 | 1 | 1 | 11 | 3 | 2 | 4 | 88 | 0 | 0.00% | 1 | 0.19% | 1 | 0.11% |
| 118 | 2 | 2 | 2 | 2 | 1 | 2 | 2 | 0 | 0.00% | 1 | 0.19% | 1 | 0.11% |
| 122 | 7 | 2 | 2 | 39 | 1 | 59 | 78 | 0 | 0.00% | 1 | 0.19% | 1 | 0.11% |
| 141 | 7 | 5 | 2 | 13 | 1 | 13 | 1 | 0 | 0.00% | 1 | 0.19% | 1 | 0.11% |
| 298 | 3 | 3 | 3 | 1 | 56 | 1 | 1 | 0 | 0.00% | 1 | 0.19% | 1 | 0.11% |
