# Supplementary material for: Virulence-Associated Genes and Genetic Diversity of Avian Pathogenic (APEC) and Fecal (AFEC) E. Coli Isolates From Chickens
Source: Research Square preprint supplement (doi:10.21203/rs.3.rs-644399/v2), 2021-08-04
Supplement: Supplementary file 4 [file f8ea9bc2e87c60bda5ab55fd.docx]

Table S1 Correlation of the VAGs with the phylogenetic group.

| virulence-associated genes | | Phylogroup | | | |
| --- | --- | --- | --- | --- | --- |
| A(n=298) | B1 (n=166) | B2 (n=291) | D (n=173) |
| Adhesins | *fimC* | 256 | 148 | 287 | 167 |
| *papC* | 0 | 0 | 16 | 2 |
| *tsh* | 141 | 72 | 229 | 137 |
| *mat* | 108 | 62 | 261 | 145 |
| Invasins | *ibeA* | 0 | 0 | 0 | 0 |
| Toxins | *astA* | 20 | 18 | 102 | 58 |
| *vat* | 3 | 4 | 105 | 54 |
| *hlyF* | 20 | 18 | 109 | 64 |
| Iron acquisition systems | *iroN* | 298 | 166 | 291 | 173 |
| *fyuA* | 60 | 39 | 251 | 132 |
| *iucD* | 77 | 48 | 211 | 112 |
| *irp2* | 156 | 88 | 271 | 153 |
| Protectins/Serum resistance | *iss* | 188 | 107 | 272 | 156 |
| *neuC* | 0 | 1 | 33 | 10 |
| *ompT* | 298 | 166 | 291 | 173 |
| *cva/cvi* | 8 | 6 | 77 | 44 |
| Average | | 5.48 | 5.68 | 9.64 | 9.13 |
